# 1 **Cause and consequences of genome duplication in haploid yeast populations**

2

3 Kaitlin J. Fisher\*, Sean W. Buskirk\*, Ryan C. Vignogna, Daniel A. Marad, Gregory I. Lang

4 *Department of Biological Sciences, Lehigh University, Bethlehem PA 18015*

5 \*These authors contributed equally to this work.

6

## 7 **ABSTRACT**

8 **Whole genome duplications (WGD) represent important evolutionary events that shape future**  
9 **adaptation. WGDs are known to have occurred in the lineages leading to plants, fungi, and**  
10 **vertebrates. Changes to ploidy level impact the rate and spectrum of beneficial mutations and**  
11 **thus the rate of adaptation. Laboratory evolution experiments initiated with haploid**  
12 ***Saccharomyces cerevisiae* cultures repeatedly experience WGD. We report recurrent genome**  
13 **duplication in 46 haploid yeast populations evolved for 4,000 generations. We find that WGD**  
14 **confers a fitness advantage, and this immediate fitness gain is accompanied by a shift in**  
15 **genomic and phenotypic evolution. The presence of ploidy-enriched targets of selection and**  
16 **structural variants reveals that autodiploids utilize adaptive paths inaccessible to haploids. We**  
17 **find that autodiploids accumulate recessive deleterious mutations, indicating an increased**  
18 **capacity for neutral evolution. Finally, we report that WGD results in a reduced adaptation rate,**  
19 **indicating a trade-off between immediate fitness gains and long term adaptability.**

## 20 INTRODUCTION

21 The natural life cycle of budding yeast alternates between haploid and diploid phases. Both  
22 ploidies can be stably propagated asexually through mitotic division. Both theory and experimental work  
23 show that haploids adapt faster than diploids, likely due to recessive beneficial mutations (Orr and Otto  
24 1994; Zeyl, Vanderford, Carter 2003). Curiously, however, repeated attempts at evolving experimental  
25 haploid populations have resulted in recurrent whole genome duplications yielding populations of  
26 autodiploids (Gerstein *et al.* 2006; Hong and Gresham 2014; Voordeckers *et al.* 2015); see **Table 1** for  
27 additional). Proposed explanations of this phenomenon include artifacts of strain construction  
28 (Venkataram *et al.* 2016), unintended mating events (Voordeckers *et al.* 2015), and an adaptive  
29 advantage of diploidy (Gerstein *et al.* 2006).

30 Whole genome duplication (WGD) in asexual haploid populations could provide a fitness  
31 advantage in several different ways. Cell size scales with DNA content in yeast (Gregory 2001), and  
32 increased cell size may facilitate more rapid metabolism and increased growth rate. Indeed, increased  
33 cell volume has been reported in laboratory-evolved microbial populations (Lenski and Travisano  
34 1994). Gene expression patterns also vary with ploidy (Galitski *et al.* 1999), and diploid-specific gene  
35 regulation may be optimal. “Ploidy drive” has been used to describe the phenomenon by which ploidy  
36 changes in evolving fungi favor restoration of the historical ploidy state (Gerstein *et al.* 2017). Natural  
37 *Saccharomyces cerevisiae* isolates are typically diploid (Liti 2015) and occasionally polyploid (Ezov *et al.*  
38 2006). If most selection has occurred on these higher ploidy states, then gene regulation and cell  
39 physiology of diploids should be better optimized relative to haploids.

40 Despite the recurrence of diploidization events in haploid-founded yeast lineages, the nature of  
41 the fitness advantage of diploidy remains unclear. Some studies detect a fitness benefit (Gorter *et al.*  
42 2017; Venkataram *et al.* 2016), while no advantage is detected in others (Gerstein and Otto 2011; Hong  
43 and Gresham 2014). A survey of the effect of ploidy on growth rate in otherwise isogenic strains  
44 indicates that the benefit of ploidy varies across conditions and optimal ploidy states are contingent on  
45 environment (Zörgö *et al.* 2013). In environments where duplication does not confer a direct fitness  
46 advantage, it may afford indirect benefits that are then themselves acted upon by selection. Diploidy  
47 may protect evolving lineages from purifying selection through buffering the effects of deleterious  
48 recessive mutations. Indeed, 15% of viable single gene deletions in haploids exhibit growth defects in  
49 rich media, while 97% of heterozygous gene deletions show no detectable phenotype in the absence of  
50 perturbation (Deutschbauer *et al.* 2005). This “masking” hypothesis also has experimental support from  
51 mutagenesis studies (Mable and Otto 2001), and this effect could be advantageous in populations in  
52 which the deleterious mutation rate is sufficiently high.

53 Autodiploids could invade haploid populations due to increased access to beneficial mutations.  
54 Ploidy-dependent mutations are known to arise in experimental evolution (Gerstein 2013; Marad and  
55 Lang 2017), and a favorable shift in the distribution of fitness effects may follow genome duplication.  
56 Structural variants - deletions, amplifications, and translocations - have repeatedly been shown to be  
57 adaptive in experimentally evolving yeast populations (Dunham *et al.* 2002; Gresham *et al.* 2008).  
58 Diploids have a greater tendency to form copy number variants (CNVs), especially large deletions  
59 (Zhang *et al.* 2013). Likewise, aneuploidies accumulate at a significantly higher rate in diploids in the  
60 absence of selection (N. Sharp, *personal communication*, Aug. 2017). If structural variants are more  
61 frequent, more variable, and more tolerable in diploids, genome duplication may enable access to novel  
62 adaptive paths. Given the repeated observation of displacement of haploids by diploids (**Table 1**), and  
63 the absence of clear evidence for instantaneous fitness advantages of isogenic diploidy that is broadly  
64 applicable across experiments, it is possible that selection for and maintenance of diploidy is a complex  
65 process involving both direct selection on ploidy state and second order selection, or selection for  
66 indirect fitness benefits associated with higher ploidy.

67 Here we show recurrent WGD in 46 haploid-founded populations during 4,000 generations of  
68 laboratory evolution in rich media. We track the dynamics of genome duplication across the haploid-  
69 founded populations, revealing that autodiploids fix by generation 1,000 in all 46 populations.  
70 Competitive fitness assays show that WGD provides a 3.6% fitness benefit in the selective  
71 environment. We find that the immediate fitness gain is accompanied by a loss of access to recessive  
72 beneficial mutations. As a consequence, the rate of adaptation of autodiploids slows. Sequencing of the  
73 evolved genomes indicates that autodiploids have increased access to structural variants and largely  
74 utilize a different spectrum of mutations to adapt compared to haploids. Finally, we show that  
75 autodiploids are buffered from the effects of recessive deleterious mutations, consistent with a long-  
76 term benefit to maintaining a diploid genome and loss of redundancy following WGD.

77

## 78 **RESULTS**

### 79 **Sequenced genomes indicate early and recurrent fixation of autodiploids**

80 Two clones were sequenced from each of 46 haploid-founded populations after 4,000  
81 generations of evolution, revealing over 5,100 *de novo* mutations distributed uniformly across the  
82 genome, representing the largest dataset of mutations identified in *S. cerevisiae* experimental evolution  
83 to date (**Fig. S1**; **Dataset 1**). Mutations are normally distributed across clones (one-sample  
84 Kolmogorov-Smirnov test,  $\alpha=0.05$ ) with a mean of  $91 \pm 20$  (**Fig. S2A**). Most mutations in the sequenced  
85 clones were called at  $\sim 0.5$  (implying heterozygosity), a surprising result given that the populations were  
86 founded by a haploid ancestor. Recurrent WGD events were suspected given that each clone

87 maintained its ancestral mating type allele. Further, this hypothesis of WGD was supported by the  
88 observation that clones are not heterozygous at polymorphic sites that differed between the *MATa* and  
89 *MAT $\alpha$*  ancestors. Finally, evolved autodiploids are mating competent, pointing to duplication of haploid  
90 genotypes.

### 91 **Autodiploids are detected early, sweep quickly, and exhibit a fitness advantage**

92 We determined the fitness effect of genome duplication by directly competing *MATa/a*  
93 autodiploids against an otherwise isogenic haploid *MATa* reference. To control for possible artifacts of  
94 construction, we independently constructed and competed 10 *MATa/a* diploids. All 10 *MATa/a*  
95 autodiploid reconstructions exhibit a relative fitness advantage significantly higher than a control  
96 haploid strain (Welch's t-test,  $t=16.28$   $df=19$ ,  $p<.001$ ). Genome duplication alone in the absence of any  
97 other variation provides a mean fitness benefit of 3.6% in these experimental conditions (**Fig. 1A**).

98 To determine the timing of duplication events, we performed time-course DNA content staining  
99 on cryoarchived samples for 16 populations (8 of each mating-type). Autodiploids arise quickly in all 16  
100 populations, fixing by generation 1,000 in all but 2 populations (**Fig. 1B**, **Fig. S3**, **Fig. S4**). Diploids are  
101 present at 2% - 11% in 11/16 populations at generation 60, the earliest time point available for assay.  
102 Some populations appear to show clonal interference by fit haploids, with autodiploid fractions briefly  
103 decreasing between some time points. Aside from such slight variations, patterns of emergence and  
104 spread of autodiploids display show similar dynamics for all 16 populations examined.

105 We examined whether the degree of parallelism observed in ploidy dynamics can be attributed  
106 to ancestral ploidy polymorphisms present at the onset of the experiment. Three lines of evidence  
107 support the independent origin of autodiploidy in this experiment. First, the cultures were initiated from  
108 two starting strains (*MATa* and *MAT $\alpha$* ). There is no significant difference in autodiploid frequency  
109 between mating-types at any generation (**Fig. S3**), meaning if autodiploids did, in fact, arise in both  
110 independent inoculating cultures, they would have had to achieve roughly the same frequency, which is  
111 highly unlikely. Second, no diploids were detected by DNA content staining in any populations at  
112 generation 0, indicating autodiploids were not present in the inocula above our detection limit of 1%.  
113 Third, computational simulations show that low frequency autodiploids are insufficient to explain the  
114 recurrent observation of autodiploid fixation events in all 46 replicate populations. Autodiploids with a  
115 3.6% fitness advantage starting at a frequency of 0.01, the highest frequency we modeled, have a  
116 probability of fixation an a given population of 0.88 and therefore the chance of fixation in all 46  
117 populations would be  $2.5 \times 10^{-3}$  (**Fig. S5**). Taken together, this argues that, while ancestral autodiploids  
118 may have swept in some populations, ancestral ploidy variation is insufficient to explain autodiploid  
119 fixation in all 46 populations. Therefore independent, parallel WGD events during the evolution  
120 experiment are necessary to explain the recurrent fixation reported here.

## 121 **Autodiploids adapt more slowly than haploids**

122 To examine how the shift to diploidy impacted the dynamics of adaptive evolution, we measured  
123 population fitness for all populations at ~300-generation intervals. Mean time-course fitness estimates  
124 show a change in slope following 1,000 generations. This corresponds roughly to the time that  
125 autodiploids have fixed in most focal populations and are high frequency in the remaining populations  
126 (**Fig. 1B**). We compared the rate of adaptation before and after the fixation of diploids in 13 focal  
127 populations for which quality fitness data was available. Because many factors, including epistasis,  
128 could explain a change in adaptation rate over time, we used a repeated measures ANOVA to compare  
129 the effect of ploidy on adaptation rate using time-course fitness data from diploid-founded populations  
130 that were evolved in parallel (Marad and Lang 2017) (**Fig. 1C**). The interaction of founding ploidy and  
131 generation has a significant effect ( $F(1, 49)=78.04$ ,  $p<.001$ ,  $\eta_p^2 = 0.614$ ). Post hoc comparisons using a  
132 Bonferroni correction indicate that rates of adaptation are significantly higher in haploid-founded  
133 populations than diploids ( $p<.001$ ), and that adaptation rate does not differ once autodiploids fix  
134 ( $p=.38$ ). These data corroborate previous findings regarding the effect of ploidy on adaptation rate  
135 (Gerstein *et al.* 2011; Marad and Lang 2017) and show that autodiploidy provides an immediate fitness  
136 gain at the expense of slowing subsequent adaptation.

## 137 **Autodiploid genomes harbor autodiploid specific mutations**

138 Duplication of a haploid genome affects both cell physiology and the phenotypic consequences  
139 of new mutations. Therefore, the selective pressure on a gene may vary depending on ploidy state. To  
140 understand how genome evolution is driving adaptation in the autodiploid populations, we utilize a  
141 recurrence approach that accounts for both the number of mutations observed in a gene and the  
142 expectation that the observed number of mutations of a given gene occurred by chance alone  
143 controlling for gene length. The resulting probabilities were used to identify 20 common genic targets of  
144 selection (**Fig. 2A**). There is a median of 4 recurrent targets per clone with only 1 population containing  
145 no common target mutations. GO-component term analysis indicates common targets are enriched for  
146 genes whose protein products localize to the cell periphery ( $p = 0.001$ ). Cell periphery targets include  
147 *CCW12* and *KRE6*, which both appear to be under extremely strong selective pressure when using the  
148 probability metric as a proxy for strength of selection. Interestingly, a tRNA gene, tL(GAG)G, was also  
149 identified as a common target of selection (**Fig. S6**). This is the first evidence of adaptive tRNA  
150 mutations in laboratory yeast evolution.

151 To better understand the functional basis of adaptation, we examined the distribution of  
152 mutations within each gene (**Fig. 2B**). Three broad patterns emerge. First, we observe selection for  
153 loss-of-function alleles, e.g. 9 of 11 mutations in *WHI2* are high impact (frameshift or nonsense).  
154 Adaptive loss-of-function alleles are common in experimental microbial evolution (Cooper *et al.* 2001;

155 Kvittek and Sherlock 2013; Venkataram *et al.* 2016). We also observe selection for change-of-function  
156 alleles. For example, only missense and synonymous mutations are seen in *PDR5*. Finally, we observe  
157 mutations in common targets that cluster within specific domains. This is illustrated by the clustering of  
158 mutations in the C-terminus of both *KRE6* (n=21) and *STE4* (n=6).

159 We compared the common targets of selection identified in autodiploid clones to those identified  
160 with the same approach in a comparable haploid dataset (Lang *et al.* 2013) (**Fig. S7**). We identify  
161 several haploid- and autodiploid-enriched targets (**Fig. 2C**). Ploidy-enriched targets include genes  
162 mutated more often in one ploidy (e.g. *CCW12* and *KRE6* in autodiploids; *YUR1* and *ROT2* in haploids)  
163 or exclusively in one ploidy (e.g. *PHO81*, *YTA7*, *IRC8* in autodiploids; *STE12* in haploids).

### 164 **Loss of heterozygosity hotspots occur on Chromosomes VII and XV**

165 Homozygous mutations, while the minority, are common. Clones contain between 0 and 17  
166 homozygous mutations, with an average of 5.4. Homozygous mutations could either represent  
167 mutations that arose before duplication events or loss of heterozygosity (LOH) of heterozygous  
168 mutations. We find that the homozygous mutations are not distributed randomly throughout the  
169 genome; instead, they tend to cluster in particular regions of the genome (**Fig. 3**). These clusters,  
170 located on the right arms of Chr. XII and Chr. XV, account for 55% of all homozygous mutations. This  
171 clustering implies that most homozygous variants result from recombination events. By removing  
172 homozygous mutations occurring in these regions from analysis, the average number of homozygous  
173 mutations per clone drops to 2.4. This indicates that only a few mutations arose in a haploid  
174 background. Most genome evolution, therefore occurred after WGD, and thus genome duplications  
175 occurred early in the 4,000 generation evolution experiment.

176 Mutations in the common targets of selection are observed in various states zygosity. Most  
177 genes (12/20) are found mutated in both heterozygous and homozygous states across clones,  
178 indicating partial or full dominance of fitness effects. Seven genes only ever contain heterozygous  
179 mutations (*ANP1*, *LCB2*, *LTE1*, *PHO4*, *SIM1*, *STE4*, *YTA7*). These mutations are candidates for  
180 overdominant effects (Sellis *et al.* 2011). Finally, only one gene, *CTS1*, is never found mutated in a  
181 heterozygous state. A reasonable hypothesis would be that the *cts1* mutations are recessive; however,  
182 we have previously identified *cts1* mutations in evolved diploid populations and found it to be close to  
183 fully dominant (Marad and Lang 2017). Instead, the position of *CTS1* on the right arm of Chr. XII, a  
184 LOH hotspot, could explain why it is only observed in a homozygous state (**Fig. 3**).

185

### 186 **Structural variants are common to autodiploids**

187 In addition to changing the genetic targets of selection, genome duplication permits access to  
188 structural variants not accessible to haploid genomes. We analyzed aneuploidies and CNVs in

189 autodiploid genomes as well as previously sequenced haploid populations (Lang *et al.* 2013) (**Figs. 4 &**  
190 **S8; Datasets 2 & 3**). Two types of aneuploidies are observed in autodiploids: trisomy III (which fixes in  
191 five populations) and trisomy VIII (which fixes in one) (**Table 2**). CNVs are common in autodiploid  
192 genomes. Of the 46 autodiploid populations, CNVs appear in 19 and fix in 14. The 19 independently  
193 occurring autodiploid CNVs fall into 10 groups based on genomic position (**Table 2**). Autodiploid CNVs  
194 consist of both amplifications (n=4) and deletions (n=6). In contrast, no aneuploidies and only two  
195 amplifications are detected amongst the 40 haploid populations. These two amplifications are also  
196 observed in autodiploids.

### 197 **Autodiploids are buffered from deleterious mutations**

198 To determine the extent to which an increase in ploidy buffers diploid lineages against the  
199 effects of deleterious mutations, we compared the frequency of mutations in essential genes in  
200 autodiploids with those of *MATa* haploids described previously (Lang *et al.* 2013). We specifically  
201 analyzed frameshift and nonsense mutations that would likely phenocopy the null mutants used to  
202 characterize genes as essential. Sixty-three of 66 high impact mutations in essential genes are  
203 heterozygous. For the remaining three mutations, zygosity is inconclusive due to low coverage (**Fig.**  
204 **S2B**). We find high impact mutations in essential genes to be exceptionally rare in haploids, with only a  
205 single case observed (**Fig. 5A**). In contrast, autodiploids contain a significantly higher proportion of high  
206 impact mutations in essential genes ( $\chi^2(1) = 20.32, p < 0.0001$ ). As expected, the proportion of low  
207 impact mutations within essential genes is consistent across ploidies ( $\chi^2(1) = 0.909, p = 0.339$ ).  
208 Essential genes are also present within two of the large deletions observed in autodiploids (**Table 2**).

209 To experimentally validate that recessive lethal mutations accumulate in autodiploids, we  
210 sporulated three *MATa/a* from three different populations and performed tetrad dissections. Clones  
211 A02a, B01a, and C03b were selected because they contain no identifiable aneuploidies that would  
212 complicate measures of spore viability. Out of 20 total dissected tetrads (80 total spores) per clone,  
213 spore viability ranged from 4% to 66% in evolved autodiploid clones (**Fig. 5B**). Further, a substantial  
214 fraction of germinated spores developed morphologically small colony sizes relative to controls. We  
215 compared observed spore viability to expected viability based on the number of high impact mutations  
216 in genes annotated as essential. The only clone for which we observed four-spore viable tetrads, B01a,  
217 is also the only clone with no predicted recessive lethal mutations. Nonetheless, both A03a and B01a  
218 have significantly lower spore viability than expected (**Fig. 5B**). This in part may be due a genetic load  
219 imposed by segregating deleterious alleles. Consistent with our sequencing data, these data indicate  
220 that diploidy permits the accumulation of recessive lethal and deleterious mutations on a relatively short  
221 time scale.

222

## 223 DISCUSSION

224 Whole genome duplications (WGDs) are significant evolutionary events that have profound  
225 impacts on genome evolution. Evidence of ancient whole-genome duplication events is found within  
226 lineages ancestral to most extant eukaryotic taxa (Jaillon *et al.* 2004; Meyer and Van de Peer 2005;  
227 Tang *et al.* 2008), including at least two WGDs in the vertebrate lineage (Dehal and Boore 2005), and a  
228 WGD approximately 100 mya in the *Saccharomyces* lineage (Kellis, Birren, Lander 2004; Wolfe and  
229 Shields 1997). In addition, the existence of numerous contemporary polyploid taxa suggests that  
230 genome duplication plays a role in short-term adaptive evolution (Van de Peer, Maere, Meyer 2009).  
231 Here, we show that experimental evolution of haploid *Saccharomyces cerevisiae* results in rapid and  
232 recurrent WGD. Clones with duplicated genomes arise early in all 46 populations and fix rapidly. We  
233 show that the fixation of autodiploids is due to a high rate of occurrence and a large fitness effect  
234 conferred by WGD.

235 Although the invasion and subsequent fixation of autodiploids in haploid-founded lineages has  
236 been reported before in yeast (see **Table 1**), a clear fitness advantage to diploidy has not always been  
237 evident. By employing a competitive growth assay, we demonstrate a relatively large fitness effect of a  
238 duplicated genome in our selective environment. A 3.6% fitness effect is substantial: in a recent study  
239 we quantified fitness effects of over 116 mutations from 11 evolved lineages in the same conditions,  
240 and only 9 conferred a fitness benefit greater than 3.6% (Buskirk, Peace, Lang 2017). The biological  
241 basis of this fitness advantage is unclear. However, there are several strong possibilities. Increased cell  
242 size, differential gene regulation, and a diploid-specific proteome (De Godoy *et al.* 2008; Galitski *et al.*  
243 1999) may all contribute to the adaptive advantage of diploidy. More generally, environmental  
244 robustness is often associated with increases in ploidy (Van de Peer, Maere, Meyer 2009).

245 The recurrent and remarkably parallel manner in which autodiploids arise and fix points to not  
246 only a large fitness effect, but a high rate of occurrence. Our previous work has shown that parallel  
247 evolution is evident at the level of genetic pathway and even gene (Buskirk, Peace, Lang 2017; Marad  
248 and Lang 2017). However, the extent of the convergence observed here – where all 46 populations  
249 evolve to be autodiploids – is unprecedented in our experimental system. While it cannot be dismissed  
250 that some autodiploids were present in the founding inoculum, they are below our 1% detection limit.  
251 Autodiploids at this low of a frequency in the inoculum is not sufficient to explain the extent of fixation  
252 observed (**Fig. S5**). Simulations indicate the probability of an autodiploid lineage at 1% fixing in 46 out  
253 of 46 replicate populations is  $2.5 \times 10^{-3}$ . Furthermore, given the common dynamics observed in  
254 populations of both mating types, autodiploids would have had to arise in “jackpot” fashion and reach  
255 a similar frequency in the inocula of both mating-types. These data strongly support independent WGD  
256 events in replicate populations, suggesting a high background rate of duplication. This is consistent



257 with the observation of frequent WGD in mutation accumulation lines (Lynch *et al.* 2008). Using a  
258 barcode-enrichment assay, Venkataram *et al.* (2016) found that roughly half of all evolved clones with  
259 increased fitness that arose in a short-term enrichment experiment possessed no mutation apart from a  
260 WGD. The rate of WGD, therefore, is likely several-fold higher than the per base pair mutation rate.

261 Given the prevalence of autodiploids in the present evolution experiment, it is worth asking why  
262 autodiploids were not reported in a previous haploid evolution experiment in which ostensibly the  
263 identical strain and conditions were used (Lang *et al.* 2013). It is possible that in the prior experiment  
264 autodiploids did not fix or they could have fixed but were not detected. Despite conscious efforts to  
265 maintain identical selective environments, subtle differences in the conditions may exist given that  
266 evolution experiments were conducted years apart in different facilities. Indeed, inconsistency in the  
267 appearance of WGD across experiments and conditions is common in the field (Gorter *et al.* 2017;  
268 Voordeckers *et al.* 2015). Even subtle differences in the evolution conditions could shift the selective  
269 benefit of autodiploidy and yield population dynamics different from those seen here. Alternatively, it is  
270 possible that autodiploids did fix in the previous haploid evolution experiment but went undetected. The  
271 populations analyzed in the haploid study were part of a larger ~600 population experiment, and the 40  
272 focal populations were selected based on the presence of a sterile phenotype. Mutations producing  
273 sterile phenotypes are predominantly adaptive and recessive loss-of-function (Lang, Murray, Botstein  
274 2009). The presence of such beneficial mutations would have biased the selection of populations  
275 towards those retaining haploidy. We analyzed a subset of the remaining ~560 populations by DNA  
276 content staining and find that ~30% (3 of 10) of them appear autodiploid at generation 1,000, though  
277 this is still less than we report here. Further at least one of the forty sequenced populations (RMS1-  
278 E09, Lang *et al.*, 2013) which appeared to be an autodiploid based on the presence of a large number  
279 of mutations present at a frequency of 0.5, was confirmed as 2N through ploidy-staining.

280 The consequences of WGD are apparent on both the phenotypic and genotypic level. One such  
281 consequence is the susceptibility of autodiploids to Haldane's sieve, resulting in a "depleted" spectrum  
282 of beneficial mutations. We find a decline in adaptation rate following WGD, which mirrors findings from  
283 studies that directly compare the rates of haploid population adaptation with that of diploids (Gerstein *et al.*  
284 *et al.* 2011; Marad and Lang 2017). This implies a fitness tradeoff in the shift from 1N to 2N, wherein the  
285 fixation of a large-effect beneficial genotype comes at the cost of eliminating access to future recessive  
286 beneficial mutations. This tradeoff associated with genome duplication is predicted when population  
287 size is large and most beneficial mutations are partially or fully recessive (Otto 2007), conditions that  
288 are met in our populations (Lang *et al.* 2013; Marad and Lang 2017).

289 Autodiploids share physiological traits with both haploid and diploid cell types. Like their haploid  
290 founders, autodiploids possess only a single mating-type allele and will readily mate with cells of the

291 opposite mating-type, indicating haploid-specific regulation of mating-pathway genes. As with diploids,  
292 autodiploids possess a 2N genome and exhibit larger cell size (Galitski *et al.* 1999). Consequently, we  
293 observe some overlap in the spectrum of beneficial mutations. We have identified targets of selection  
294 shared between haploids and autodiploids along with targets specific to autodiploids. While several  
295 targets were mutual to haploids and autodiploids, the extent of recurrence varied by gene. For example,  
296 *IRA1* mutations were common to both ploidies but enriched in haploids. In contrast, there were five  
297 ploidy-specific genes that were targets in autodiploids but never mutated in haploids. These genes  
298 (*PHO81*, *YTA7*, *PHO4*, *IRC8*, and *PSA1*) represent targets of selection that are specifically enriched in  
299 autodiploids, suggesting that WGD may expose adaptive pathways that are not easily accessible to  
300 either haploids or diploids.

301 Genome duplication also has consequences on genome stability and the evolution of structural  
302 variation. Across our 46 populations we identify 6 independently evolved aneuploidies and 20  
303 independently evolved structural variants. Structural variants are more frequent in autodiploid genomes  
304 than in evolved haploid genomes of the same background, even after accounting for length of  
305 evolution. Haploids are constrained: whereas the structural variants observed in haploids always result  
306 in a net gain of genetic material, autodiploid structural variants include both amplifications and  
307 deletions. The ability to generate a greater degree of structural variation could provide a secondary  
308 advantage to WGD. Aneuploidies, large rearrangements, and CNVs have been shown to arise and  
309 confer an advantage in experimentally evolving yeast populations (Chang *et al.* 2013; Selmecki *et al.*  
310 2015). Of note, several of the recurrent structural arrangements described in the present study,  
311 including trisomy III and a 317 kb deletion on Chr. III, are described as beneficial in Sunshine *et al.*  
312 (2015). The observation of both gain and loss of genetic material from Chr. III may indicate complex  
313 selection on phenotypes unachievable through point mutations.

314 Loss of heterozygosity (LOH) provides a means of overcoming the masking effect of ploidy in  
315 autodiploids allowing recessive beneficial mutations to become homozygous. Analysis of the  
316 distribution of homozygous mutations across evolved autodiploid genomes reveals LOH frequently  
317 occurs in two locations: on the right arm of Chr. XII and the right arm of Chr. XV. The right arm of Chr.  
318 XII has been characterized as a hotspot for LOH in experimental and natural populations (Magwene *et al.*  
319 *et al.* 2011; Marad and Lang 2017) mediated by a high rate of recombination at the rDNA repeats (Keil  
320 and Roeder 1984). To our knowledge, a mitotic recombination hotspot on Chr. XV has not been  
321 described. Recurrent LOH may have substantial evolutionary implications as the affected regions  
322 may experience different rates of genome evolution and divergence than the rest of the genome. On  
323 one hand, adaptation may be slow due to the periodic purging of variation and exposure of deleterious  
324 mutations to selection. On the other hand, the rate of adaptation may be increase by providing access

325 to recessive beneficial mutations that would otherwise be masked by Haldane's sieve. Theory predicts  
326 that sufficient mitotic recombination may allow asexual populations to circumvent Haldane's sieve  
327 (Mandegar and Otto 2007). While we only show prevalence of LOH and not functional evidence of  
328 adaptive LOH, such events have been repeatedly observed in adapting yeast populations (Gerstein,  
329 Kuzmin, Otto 2014; Smukowski Heil *et al.* 2017). Further, the LOH on Chr. XV was not detected  
330 previously in diploids (Marad and Lang 2017), an observation that is more easily explained by selection  
331 than a change in the rate of occurrence.

332 The same masking effect that stifles recessive beneficial mutations is also predicted to permit  
333 the accumulation of deleterious mutations in diploids (Mable and Otto 2001). In evolved haploid  
334 populations few if any deleterious mutations fix: previously only 1 of 116 evolved mutations was  
335 characterized as putatively deleterious (Buskirk, Peace, Lang 2017). We show that, in contrast to  
336 haploid genomes, evolved autodiploid genomes harbor an abundance of putative recessive lethal  
337 mutations (**Fig. 5A**). We sporulated autodiploids with normal 2N karyotypes by complementing the  
338 *MAT $\alpha$*  information on a plasmid. We find evidence of the accumulation of both lethal and deleterious  
339 mutations as indicated by a large number of inviable and slow-growing haploid spores (**Fig. 5B**). The  
340 accumulation of recessive deleterious mutations in the genomes of clonal diploids may have long-term  
341 effects on adaptation. With each successive recessive deleterious mutation that fixes, genetic  
342 redundancy is eliminated, causing a shift in the distribution of fitness effects and an increase in the  
343 target size for lethal or deleterious mutations. Interestingly, loss of redundancy occurred rapidly  
344 following the historical yeast WGD (Scannell *et al.* 2006). Here we show that recessive deleterious and  
345 lethal mutations can accumulate shortly after WGD. On a population level, the increased target size for  
346 neutral mutations may increase standing variation between selective sweeps and may explain  
347 populations with deeply diverging clones (**Fig. S8**).

348 The ancient WGD in the *Saccharomyces* lineage is thought to have occurred by alloduplication  
349 followed by LOH at the mating-type locus to restore fertility (Marcet-Houben and Gabaldón 2015; Wolfe  
350 2015), and therefore would have gone through an intermediate asexual 'duplicated' diploid state, similar  
351 to the *MAT $a/a$*  and *MAT $\alpha/\alpha$*  populations investigated here. We demonstrate that this cell type has a  
352 direct fitness advantage over an isogenic haploid cell type. The immediate fitness gain of WGD is  
353 accompanied by several evolutionary tradeoffs that impact future adaptability including a reduced rate  
354 of adaptation, shifted distribution of beneficial mutations, karyotype changes, and the accumulation of  
355 recessive deleterious and lethal mutations that reduces redundancy in the duplicated genome.

356

## 357 **METHODS**

### 358 **Strain construction**

359 *MATa/a* strains were constructed for fitness assays by converting yGIL701, a fluorescently  
360 labeled *MATa/α* diploid isogenic to our ancestral haploid background, to *MATa/a*. yGIL701 was struck  
361 out and 10 separate clones were selected. Clones were transformed with pGIL088, which encodes a  
362 gal-inducible *HO* and a *MATa* specific *HIS3* marker. 5 ml cultures of YPD were inoculated with a single  
363 transformant for each starting clone. Cultures were grown for 48 hours, allowing for glucose to be  
364 depleted and catabolite repression of *GAL* genes to be lifted. After 48 hours 100 μl of each culture was  
365 plated to SD –his. Histidine prototrophs were screened in α-Factor (Sigma) for shmoos. Confirmed  
366 strains were used in competition assays.

### 367 **Evolution experiment**

368 Experimental populations were founded with 130 μl of isogenic W303 ancestral culture; 22 with  
369 yGIL432 (*MATa*, *ade2-1*, *CAN1*, *his3-11*, *leu2-3,112*, *trp1-1*, *URA3*, *bar1Δ::ADE2*, *hmlaΔ::LEU2*,  
370 *GPA1::NatMX*, *ura3Δ::PFUS1-yEVENUS*), and 24 with yGIL646, a *MATα* strain otherwise isogenic to  
371 yGIL432. Populations analyzed here were evolved in separate wells of a 96-well plate. Ancestral strains  
372 were grown as 5 ml overnight cultures from single colonies prior to 96 well plate inoculation. This  
373 founding plate was propagated forward and then immediately frozen down.

374 All populations analyzed here were evolved in rich glucose (YPD) medium. Cultures were grown  
375 in unshaken 96-well plates at 30°C and were propagated every 24 hours via serial dilutions of 1:1024.  
376 Approximately every 60 generations, populations were cryogenically archived in 15% glycerol.

### 377 **Fitness assays**

378 Fitness assays were performed as described previously (Buskirk, Peace, Lang 2017). Evolved  
379 autodiploid populations were mixed 1:1 with a version of the ancestral strain (yGIL432 or yGIL646,  
380 genotypes listed above) labeled with ymCitrine at *URA3*. Cultures were propagated in a 96-well plate in  
381 an identical fashion to the evolution experiment for 40 generations. Every 10 generations, saturated  
382 cultures were sampled for flow cytometry. Analysis of flow cytometry data was done using FlowJo 10.3.  
383 Selective coefficient was calculated as the slope of the change in the natural log ratio between query  
384 and reference strains. Assays were performed for all 46 evolved populations at 16 time points between  
385 generations 0 and 4,000.

386 To measure the fitness effect of autodiploidy, fitness assays were performed as described  
387 above, using instead a non-labeled version of yGIL432 as a reference. This strain was mixed 1:1 with  
388 either a fluorescently-labeled version of the same strain or one of ten biological replicate fluorescently  
389 labeled diploid strains. The fitness of each autodiploid reconstruction was calculated as the mean  
390 fitness across 12 replicate competitions.

391 Adaptation rates for each autodiploidized lineage were calculated as the rate of change  
392 between generation 0 and the time point at which diploids were present at over 98%. For comparison,

393 rate of adaptation was also calculated for 39 diploid-founded populations evolved in parallel (Marad and  
394 Lang 2017). The median time point of autodiploid fixation was generation 600 for the haploid-founded  
395 dataset. To generate a comparable dataset, rates of adaptation for diploids were calculated from  
396 generations 0-600 and 600-4000. Rates were compared in SPSS using a repeated measures ANOVA  
397 with two within subject factors (time) and two between subject factors (haploid-founded and diploid-  
398 founded). Because some groups violated homogeneity assumptions, post-hoc analysis was done using  
399 a Bonferroni correction.

#### 400 **DNA content analysis**

401 Time-course ploidy states of 16 focal evolved populations were assayed through flow cytometry  
402 analysis of DNA content as described in Gerstein and Otto (2011). Briefly, 10  $\mu$ l of each sample were  
403 inoculated in 3 ml YPD and grown overnight. 100  $\mu$ l of saturated cultures were then diluted 1:50 into  
404 YPD and grown to mid-log. To arrest in G1, 1 ml mid-log culture was transferred into 200  $\mu$ l 1M  
405 hydroxyurea and incubated on a 30°C roller drum for 3 hours. Cultures were then fixed with 70%  
406 ethanol, treated with RNase and proteinase K, stained with Cytox green (Molecular Probes), and  
407 analyzed on a BD FACSCanto. Haploid and diploid frequencies were estimated using FlowJo v10.3 by  
408 fitting data to Watson-Pragmatic cell cycle models. This method of estimation was validated with a  
409 series of known ploidy mixtures (**Fig. S9**).

#### 410 **Simulations**

411 Simulations of lineage trajectories were performed using a forward-time algorithm designed to  
412 imitate the same conditions as our evolution experiment. Estimates for the distribution of fitness effects  
413 (an exponential distribution with mean  $\bar{s}=0.85\%$ ) and beneficial mutation rate ( $U_b = 1.0 \times 10^{-4}$ ) were  
414 described previously for our experimental conditions (Frenkel, Good, Desai 2014). This model assumes  
415 the spectrum of mutations available to haploids is the same as the spectrum available to autodiploids.  
416 Simulations were performed with constant inputs for DFE parameters, beneficial mutation rate,  
417 inoculation time of the focal lineage (generation  $t = 0$ ), and fitness advantage of the focal lineage ( $s_0$   
418  $= 3.6\%$ ). The initial frequency of the focal lineage was varied ( $f_0 = 0.01\%-1.0\%$ ) for each set of  
419 simulations, and a total of ten thousand simulations were performed for each  $f_0$ .

#### 420 **Sequencing**

421 Evolved clones were obtained by streaking evolved populations to singles on YPD and selecting  
422 two clones per population. These clones were grown to saturation in 5 ml YPD and then spun down to  
423 cell pellets and frozen at -20°C. Genomic DNA was harvested from frozen pellets via phenol-chloroform  
424 extraction and precipitated in ethanol. Total genomic DNA was used in a Nextera library preparation.  
425 The Nextera protocol was followed as described previously (Buskirk, Peace, Lang 2017). All individually

426 barcoded clones were pooled and sequenced on 2 lanes of an Illumina HiSeq 2500 sequencer by the  
427 Sequencing Core Facility at the Lewis-Sigler Institute for Integrative Genomics at Princeton.

#### 428 **Sequencing analysis**

429 Two lanes of raw sequence data were concatenated and then demultiplexed using a custom  
430 python script (barcodesplitter.py) from L. Parsons (Princeton University). Adapter sequences were  
431 trimmed using the fastx\_clipper from the FASTX Toolkit. Trimmed reads were aligned to an S288c  
432 reference genome version R64-2-1 (Engel and Cherry 2013) using BWA v0.7.12 (Li and Durbin 2009)  
433 and variants were called using FreeBayes v0.9.21-24-381 g840b412 (Garrison and Marth 2012).  
434 Roughly 10,000 polymorphisms were detected between our ancestral W303 background and the S288c  
435 reference, and the corresponding genomic positions were removed from analysis. All remaining calls  
436 were confirmed manually by viewing BAM files in IGV (Thorvaldsdóttir, Robinson, Mesirov 2013).  
437 Zygosity was determined based on read depth and allele frequency (**Fig. S2B**). Mutations were  
438 classified as fixed if present in all clones from a population. Clones were genotyped for *MAT* alleles by  
439 identifying mating-type specific sequences within the demultiplexed FASTQ files.

440 Clone genomes were each independently queried for structural variants. Following BWA  
441 alignment, coverage at each position across the genome was calculated. Aneuploidies were detected  
442 by calculating median chromosome coverage and dividing this by median genome-wide coverage for  
443 each chromosome, producing an approximate chromosome copy number relative to the duplicated  
444 genome (**Fig. 4; Dataset 2**). CNVs were detected by visual inspection of chromosome coverage plots  
445 created in R (**Fig. S10; Dataset 3**).

#### 446 **Phylogenetic analysis**

447 Variants identified by SNPeff were used to infer a phylogeny based on 7,932 sites containing  
448 4,742 variable sites, either SNPs or small indels (**Fig. S8**). Evolved and ancestral sequences (n=93)  
449 were aligned with MUSCLE. A general time reversible substitution model with uniform rates (-lnL=  
450 44803.45) was selected based on jModelTest. A maximum likelihood tree was then constructed and  
451 rooted by the ancestor in MEGA. Subclades were found to be due to incomplete lineage sorting of  
452 mitochondrial polymorphisms. After phylogenetic analysis it was evident that four clones were originally  
453 attributed to incorrect populations. Tight clustering and short branch lengths suggests either very recent  
454 contamination or an issue during colony isolation (populations were struck out two to a plate on  
455 bisected YPD plates). In the text, these clones are identified by the suffix “c” and are attributed to the  
456 population to which they are most phylogenetically similar.

#### 457 **Identification of common targets and ploidy-enriched targets**

458 A recurrence approach was utilized to identify common targets of selection. A random  
459 distribution of the 3,431 coding sequence (CDS) mutations across all 5,800 genes predicts only two

460 genes to be mutated more than five times by chance alone. We determined the probability that chance  
461 alone explains the observed number of mutations of each gene by assuming a random distribution of  
462 the 3,431 mutations across the 8,527,393 bp genome-wide CDS. Common targets of selection were  
463 defined as genes with five or more CDS mutations and a corresponding probability of less than 0.1%  
464 (**Fig. 2A**). Notably, analysis using only nonsynonymous mutations identified largely the same set of  
465 common targets of selection as did analysis using all CDS mutations. To determine which targets of  
466 selection are impacted by ploidy, our recurrence approach was used to analyze mutations in a  
467 previously published *MATa* haploid dataset (**Fig. S7**) (Lang *et al.* 2013). We compared the probability of  
468 the observed number of CDS mutations in each gene between ploidies (**Fig. 2C**). A gene was  
469 considered ploidy-enriched if the ratio of probabilities was at least  $10^5$ .

#### 470 **Evolved clone sporulation and tetrad dissection**

471 Three clones (A02a, B01a, C03b) for which genome sequence data revealed no aneuploidies  
472 were selected for sporulation. Evolved *MATa/a* clones were transformed with pGIL071 which encodes  
473 the  $\alpha 2$  gene necessary for sporulation and a *URA3* marker for selection. Transformants were  
474 sporulated in Spo++ -ura media. Following 72 hours, sporulation efficiency was calculated via  
475 hemocytometer, cultures were digested with zymolyase, and tetrads were dissected on YPD agar  
476 plates. Spores were incubated 48 hours and then assayed for germination. Control strain yGIL1039,  
477 made by crossing yGIL432 to yGIL646 and converting the resulting diploid to *MATa/a* as described  
478 above, was transformed and dissected in parallel.

479 **REFERENCES**

- 480 Buskirk SW, Peace RE, Lang GI. 2017. Hitchhiking and epistasis give rise to cohort dynamics in  
481 adapting populations. *Proc Natl Acad Sci U S A* 114(31):8330-5.
- 482 Chang S, Lai H, Tung S, Leu J. 2013. Dynamic large-scale chromosomal rearrangements fuel rapid  
483 adaptation in yeast populations. *PLoS Genetics* 9(1):e1003232.
- 484 Cooper VS, Schneider D, Blot M, Lenski RE. 2001. Mechanisms causing rapid and parallel losses of  
485 ribose catabolism in evolving populations of *Escherichia coli* B. *J Bacteriol* 183(9):2834-41.
- 486 De Godoy LM, Olsen JV, Cox J, Nielsen ML, Hubner NC, Fröhlich F, Walther TC, Mann M. 2008.  
487 Comprehensive mass-spectrometry-based proteome quantification of haploid versus diploid yeast.  
488 *Nature* 455(7217):1251-4.
- 489 Dehal P and Boore JL. 2005. Two rounds of whole genome duplication in the ancestral vertebrate.  
490 *PLoS Biology* 3(10):e314.
- 491 Deutschbauer AM, Jaramillo DF, Proctor M, Kumm J, Hillenmeyer ME, Davis RW, Nislow C, Giaever G.  
492 2005. Mechanisms of haploinsufficiency revealed by genome-wide profiling in yeast. *Genetics*  
493 169(4):1915-25.
- 494 Dunham MJ, Badrane H, Ferea T, Adams J, Brown PO, Rosenzweig F, Botstein D. 2002.  
495 Characteristic genome rearrangements in experimental evolution of *Saccharomyces cerevisiae*.  
496 *Proc Natl Acad Sci U S A* 99(25):16144-9.
- 497 Engel SR and Cherry JM. 2013. The new modern era of yeast genomics: Community sequencing and  
498 the resulting annotation of multiple *Saccharomyces cerevisiae* strains at the *Saccharomyces*  
499 genome database. *Database* 2013:bat012.
- 500 Ezov TK, Boger-Nadjar E, Frenkel Z, Katsperovski I, Kemeny S, Nevo E, Korol A, Kashi Y. 2006.  
501 Molecular-genetic biodiversity in a natural population of the yeast *Saccharomyces cerevisiae* from  
502 "Evolution Canyon": Microsatellite polymorphism, ploidy and controversial sexual status. *Genetics*  
503 174(3):1455-68.
- 504 Frenkel EM, Good BH, Desai MM. 2014. The fates of mutant lineages and the distribution of fitness  
505 effects of beneficial mutations in laboratory budding yeast populations. *Genetics* 196(4):1217-26.
- 506 Galitski T, Saldanha AJ, Styles CA, Lander ES, Fink GR. 1999. Ploidy regulation of gene expression.  
507 *Science* 285(5425):251-4.
- 508 Garrison E and Marth G. 2012. Haplotype-based variant detection from short-read sequencing. *arXiv*  
509 Preprint *arXiv:1207.3907* .
- 510 Gerstein A, Kuzmin A, Otto S. 2014. Loss-of-heterozygosity facilitates passage through Haldane's  
511 sieve for *Saccharomyces cerevisiae* undergoing adaptation. *Nature Communications* 5:3819.
- 512 Gerstein AC and Otto SP. 2011. Cryptic fitness advantage: Diploids invade haploid populations despite  
513 lacking any apparent advantage as measured by standard fitness assays. *PLoS One*  
514 6(12):e26599.
- 515 Gerstein AC, Lim H, Berman J, Hickman MA. 2017. Ploidy tug-of-war: Evolutionary and genetic  
516 environments influence the rate of ploidy drive in a human fungal pathogen. *Evolution* 71(4):1025-  
517 38.
- 518 Gerstein AC, Cleathero L, Mandegar M, Otto S. 2011. Haploids adapt faster than diploids across a  
519 range of environments. *J Evol Biol* 24(3):531-40.



- 520 Gerstein AC, Chun HE, Grant A, Otto SP. 2006. Genomic convergence toward diploidy in  
521 *Saccharomyces cerevisiae*. *PLoS Genetics* 2(9):e145.
- 522 Gerstein AC. 2013. Mutational effects depend on ploidy level: All else is not equal. *Biol. Lett.*  
523 9(1):20120614.
- 524 Gorter FA, Derks MFL, van den Heuvel J, Aarts MGM, Zwaan BJ, de Ridder D, de Visser, JAGM. 2017.  
525 Genomics of adaptation depends on the rate of environmental change in experimental yeast  
526 populations. *Molecular Biology and Evolution* 34(10):2613-26.
- 527 Gregory TR. 2001. Coincidence, coevolution, or causation? DNA content, cell size, and the C-value  
528 enigma. *Biological Reviews* 76(1):65-101.
- 529 Gresham D, Desai MM, Tucker CM, Jenq HT, Pai DA, Ward A, DeSevo CG, Botstein D, Dunham MJ.  
530 2008. The repertoire and dynamics of evolutionary adaptations to controlled nutrient-limited  
531 environments in yeast. *PLoS Genet* 4(12):e1000303.
- 532 Hong J and Gresham D. 2014. Molecular specificity, convergence and constraint shape adaptive  
533 evolution in nutrient-poor environments. *PLoS Genetics* 10(1):e1004041.
- 534 Jaillon O, Aury J, Brunet F, Petit J, Stange-Thomann N, Mauceli E, Bouneau L, Fischer C, Ozouf-  
535 Costaz C, Bernot A. 2004. Genome duplication in the teleost fish *Tetraodon nigroviridis* reveals the  
536 early vertebrate proto-karyotype. *Nature* 431(7011):946-57.
- 537 Keil RL and Roeder GS. 1984. *Cis*-acting, recombination-stimulating activity in a fragment of the  
538 ribosomal DNA of *S. cerevisiae*. *Cell* 39(2):377-86.
- 539 Kellis M, Birren BW, Lander ES. 2004. Proof and evolutionary analysis of ancient genome duplication in  
540 the yeast *Saccharomyces cerevisiae*. *Nature* 428(6983):617-24.
- 541 Kosheleva K and Desai MM. 2017. Recombination alters the dynamics of adaptation on standing  
542 variation in laboratory yeast populations. *Mol Biol Evol.* Jan 1;35(1):180-201.
- 543 Kvitek DJ and Sherlock G. 2013. Whole genome, whole population sequencing reveals that loss of  
544 signaling networks is the major adaptive strategy in a constant environment. *PLoS Genetics*  
545 9(11):e1003972.
- 546 Lang GI, Murray AW, Botstein D. 2009. The cost of gene expression underlies a fitness trade-off in  
547 yeast. *Proc Natl Acad Sci U S A* 106(14):5755-60.
- 548 Lang GI, Rice DP, Hickman MJ, Sodergren E, Weinstock GM, Botstein D, Desai MM. 2013. Pervasive  
549 genetic hitchhiking and clonal interference in forty evolving yeast populations. *Nature*  
550 500(7464):571-4.
- 551 Lenski RE and Travisano M. 1994. Dynamics of adaptation and diversification: A 10,000-generation  
552 experiment with bacterial populations. *Proc Natl Acad Sci U S A* 91(15):6808-14.
- 553 Li H and Durbin R. 2009. Fast and accurate short read alignment with Burrows–Wheeler transform.  
554 *Bioinformatics* 25(14):1754-60.
- 555 Liti G. 2015. The natural history of model organisms: The fascinating and secret wild life of the budding  
556 yeast *S. cerevisiae*. *Elife* 4:e05835.
- 557 Lynch M, Sung W, Morris K, Coffey N, Landry CR, Dopman EB, Dickinson WJ, Okamoto K, Kulkarni S,  
558 Hartl DL, *et al.* 2008. A genome-wide view of the spectrum of spontaneous mutations in yeast.  
559 *Proc Natl Acad Sci U S A* 105(27):9272-7.
- 560 Mable BK and Otto SP. 2001. Masking and purging mutations following EMS treatment in haploid,  
561 diploid and tetraploid yeast (*Saccharomyces cerevisiae*). *Genetics Research* 77(1):9-26.

- 562 Magwene PM, Kayikci O, Granek JA, Reininga JM, Scholl Z, Murray D. 2011. Outcrossing, mitotic  
563 recombination, and life-history trade-offs shape genome evolution in *Saccharomyces cerevisiae*.  
564 *Proc Natl Acad Sci U S A* 108(5):1987-92.
- 565 Mandegar MA and Otto SP. 2007. Mitotic recombination counteracts the benefits of genetic  
566 segregation. *Proc Biol Sci* 274(1615):1301-7.
- 567 Marad DA and Lang GI. 2017. Restricted access to beneficial mutations slows adaptation and biases  
568 fixed mutations in diploids. *bioRxiv* :171462.
- 569 Marcet-Houben M and Gabaldón T. 2015. Beyond the whole-genome duplication: Phylogenetic  
570 evidence for an ancient interspecies hybridization in the baker's yeast lineage. *PLoS Biology*  
571 13(8):e1002220.
- 572 Meyer A and Van de Peer Y. 2005. From 2R to 3R: Evidence for a fish-specific genome duplication  
573 (FSGD). *Bioessays* 27(9):937-45.
- 574 Orr HA and Otto SP. 1994. Does diploidy increase the rate of adaptation? *Genetics* 136(4):1475-80.
- 575 Otto SP. 2007. The evolutionary consequences of polyploidy. *Cell* 131(3):452-62.
- 576 Oud B, Guadalupe-Medina V, Nijkamp JF, de Ridder D, Pronk JT, van Maris AJ, Daran JM. 2013.  
577 Genome duplication and mutations in *ACE2* cause multicellular, fast-sedimenting phenotypes in  
578 evolved *Saccharomyces cerevisiae*. *Proc Natl Acad Sci U S A* 110(45):E4223-31.
- 579 Scannell DR, Byrne KP, Gordon JL, Wong S, Wolfe KH. 2006. Multiple rounds of speciation associated  
580 with reciprocal gene loss in polyploid yeasts. *Nature* 440(7082):341-5.
- 581 Sellis D, Callahan BJ, Petrov DA, Messer PW. 2011. Heterozygote advantage as a natural  
582 consequence of adaptation in diploids. *Proc Natl Acad Sci U S A* 108(51):20666-71.
- 583 Selmecki AM, Maruvka YE, Richmond PA, Guillet M, Shores N, Sorenson AL, De S, Kishony R,  
584 Michor F, Dowell R. 2015. Polyploidy can drive rapid adaptation in yeast. *Nature* 519(7543):349-  
585 52.
- 586 Smukowski Heil CS, DeSevo CG, Pai DA, Tucker CM, Hoang ML, Dunham MJ. 2017. Loss of  
587 heterozygosity drives adaptation in hybrid yeast. *Mol Biol Evol* 34(7):1596-612.
- 588 Sunshine AB, Payen C, Ong GT, Liachko I, Tan KM, Dunham MJ. 2015. The fitness consequences of  
589 aneuploidy are driven by condition-dependent gene effects. *PLoS Biology* 13(5):e1002155.
- 590 Tang H, Bowers JE, Wang X, Ming R, Alam M, Paterson AH. 2008. Synteny and collinearity in plant  
591 genomes. *Science* 320(5875):486-8.
- 592 Thorvaldsdóttir H, Robinson JT, Mesirov JP. 2013. Integrative genomics viewer (IGV): High-  
593 performance genomics data visualization and exploration. *Briefings in Bioinformatics* 14(2):178-92.
- 594 Van de Peer Y, Maere S, Meyer A. 2009. The evolutionary significance of ancient genome duplications.  
595 *Nature Reviews Genetics* 10(10):725-32.
- 596 Venkataram S, Dunn B, Li Y, Agarwala A, Chang J, Ebel ER, Geiler-Samerotte K, Hérisant L, Blundell  
597 JR, Levy SF. 2016. Development of a comprehensive genotype-to-fitness map of adaptation-  
598 driving mutations in yeast. *Cell* 166(6):1585,1596. e22.
- 599 Voordeckers K, Kominek J, Das A, Espinosa-Cantú A, De Maeyer D, Arslan A, Van Pee M, van der  
600 Zande E, Meert W, Yang Y. 2015. Adaptation to high ethanol reveals complex evolutionary  
601 pathways. *PLoS Genetics* 11(11):e1005635.
- 602 Wolfe KH. 2015. Origin of the yeast whole-genome duplication. *PLoS Biology* 13(8):e1002221.

603 Wolfe KH and Shields DC. 1997. Molecular evidence for an ancient duplication of the entire yeast  
604 genome. *Nature* 387(6634):708.

605 Zeyl C, Vanderford T, Carter M. 2003. An evolutionary advantage of haploidy in large yeast  
606 populations. *Science* 299(5606):555-8.

607 Zhang H, Zeidler AF, Song W, Puccia CM, Malc E, Greenwell PW, Mieczkowski PA, Petes TD,  
608 Argueso JL. 2013. Gene copy-number variation in haploid and diploid strains of the yeast  
609 *Saccharomyces cerevisiae*. *Genetics* 193(3):785-801.

610 Zörgö E, Chwialkowska K, Gjuvsland AB, Garré E, Sunnerhagen P, Liti G, Blomberg A, Omholt SW,  
611 Warringer J. 2013. Ancient evolutionary trade-offs between yeast ploidy states. *PLoS Genetics*  
612 9(3):e1003388.

613

#### 614 **AUTHOR CONTRIBUTIONS**

615 KJF, SWB, and GIL conceived of the project and designed experiments. KJF and SWB performed  
616 library preparations and SWB performed sequencing analysis and bioinformatics. KJF performed the  
617 experiments. KJF, DAM, and RCV collected time-course ploidy data. RCV performed simulations. DAM  
618 collected time-course fitness data. KJF, SWB, and GIL analyzed data and wrote the manuscript.

619

#### 620 **ACKNOWLEDGEMENTS**

621 We thank Alex Nguyen (Desai lab, Harvard) for providing the plasmid with mating-type specific  
622 markers. We thank Aleeza Gerstein and Jun-Yi Leu for comments on the manuscript. This work was  
623 supported by the Charles E. Kaufman Foundation of The Pittsburgh Foundation.

624

#### 625 **COMPETING INTERESTS**

626 The authors declare no competing interests.

627

#### 628 **DATA DEPOSITION**

629 The short-read sequencing data reported in this paper have been deposited in the NCBI BioProject  
630 database (accession no. PRJNA422100).

631

#### 632 **SUPPLEMENTAL DATASETS**

633 **Dataset 1:** All 8,305 de novo mutations detected across the 46 autodiploid populations

634 **Dataset 2:** Aneuploidies detected by sequencing read depth

635 **Dataset 3:** Copy number variants detected by sequencing read depts

**Table 1: Observations of autodiploidy in experimental studies**

| <b>Study</b>                   | <b>Propagation</b>                              | <b>Evolution medium</b>  | <b>Strain background</b> | <b>Mating-type</b>        |
|--------------------------------|-------------------------------------------------|--------------------------|--------------------------|---------------------------|
| Current study                  | Batch culture, unshaken                         | YPD                      | W303                     | <i>MATa</i> & <i>MATα</i> |
| Kosheleva and Desai 2017       | Batch culture, unshaken                         | YPD                      | Sk1-W303 hybrid          | <i>MATa</i> & <i>MATα</i> |
| Gorter 2017                    | Batch culture, shaken                           | YPD with heavy metals    | BY4743                   | <i>MATa</i>               |
| Venkataram <i>et al.</i> 2016  | Batch culture, shaken                           | Carbon limited glucose   | BY4709                   | <i>MATa</i>               |
| Voordeckers <i>et al.</i> 2015 | Turbidostat                                     | 6-12% EtOH glucose       | S288c derivative         | <i>MATα</i>               |
| Hong and Gresham 2014          | Chemostat                                       | Nitrogen limited glucose | S288c derivative         | <i>MATa</i>               |
| Oud <i>et al.</i> 2013         | Anerobic batch culture in sequential bioreactor | 1:1 glucose/galactose    | CEN.PK113-7D             | <i>MATa</i>               |
| Gerstein <i>et al.</i> 2006    | Batch culture, shaken                           | YPD                      | SM2185                   | <i>MATa</i>               |

**Table 2: Structural variants in evolved autodiploids.**

| Chr.              | Start (kb) | End (kb) | Length (kb) | Copy Number     | Description | Type | Clones*                                                                        |
|-------------------|------------|----------|-------------|-----------------|-------------|------|--------------------------------------------------------------------------------|
| I                 | 210        | 225      | 15          | 1N              | CNV         | loss | <b>B01a, B01b, E11a, E11b</b>                                                  |
| III               | 85         | 85       | <10 kb      | 0N              | CNV         | loss | <b>G01a, G01b, G01c</b>                                                        |
| III               | 150        | 170      | 20          | 1N              | CNV         | loss | <b>A02a, A02b, B10a, B10b, C11a, C11b, C11c, F10a</b>                          |
| IV <sup>2</sup>   | 900        | 1000     | 100         | 3N              | CNV         | gain | <b>B12a, B12b, C03a, E12a, E12b</b>                                            |
| V <sup>3</sup>    | 450        | 500      | 50          | 1N              | CNV         | loss | <b>B11a, B11b, F10a, F10b</b>                                                  |
| VIII              | 525        | 545      | 20          | 1N              | CNV         | loss | <b>E11a, E11b</b>                                                              |
| XIII <sup>3</sup> | 190        | 200      | 10          | 1N              | CNV         | loss | C10a, D10a, E10c, H12a                                                         |
| XIII <sup>2</sup> | 190        | 200      | 10          | 3N              | CNV         | gain | <b>F02a, F02b</b>                                                              |
| XIV               | 545        | 560      | 15          | 3N              | CNV         | gain | <b>A12a, A12b</b>                                                              |
| XV                | 900        | 1100     | 200         | 3N              | CNV         | gain | G02b                                                                           |
| III               | 0          | 317      | 317         | 3N <sup>1</sup> | aneuploidy  | gain | <b>C01a, C01b, D01a, D01b, D03a, D03b, E12a, E12b<sup>1</sup>, H02a, H02b,</b> |
| VIII              | 0          | 924      | 924         | 3N              | aneuploidy  | gain | <b>A11a, A11b</b>                                                              |

\* Bolded clones indicate the CNV was found in all clones of the population

<sup>1</sup> Observed at 4N in one clone

<sup>2</sup> Also observed in one haploid

<sup>3</sup> Contains essential genes

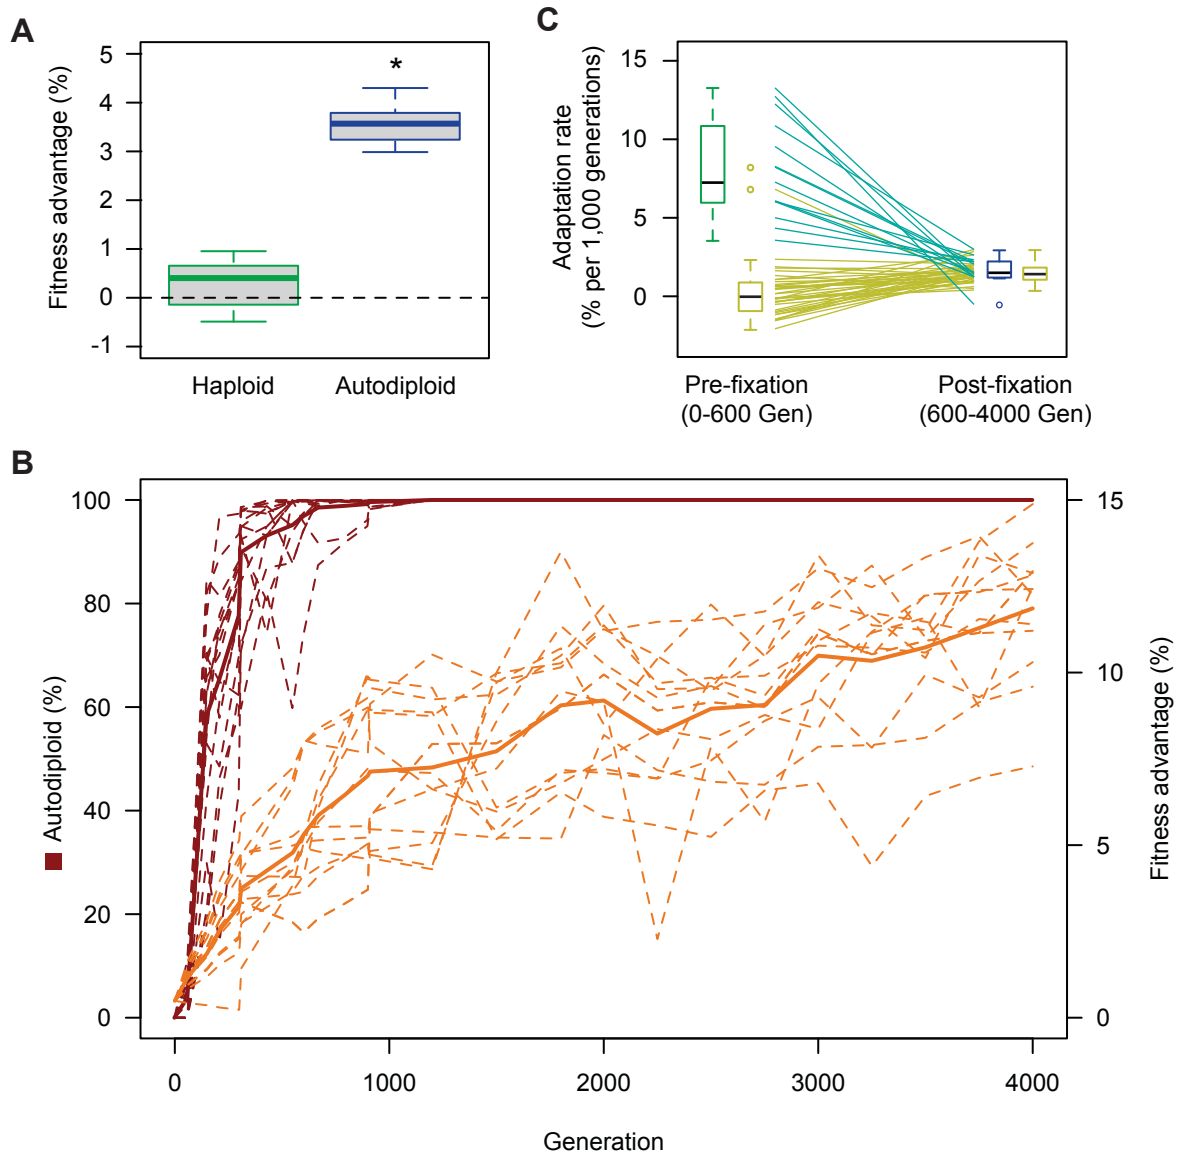

**Fig. 1 Autodiploids sweep through haploid populations due to a direct fitness advantage.** A) *MATa/a* diploids have a mean relative fitness advantage of 3.6% when competed against a haploid reference strain. Ten *MATa/a* diploids clones were constructed independently. Box plots reflect mean fitness of each clone. Autodiploids and control haploids were competed against the same haploid reference. Asterisk (\*) indicates  $p < 0.001$  (Welch's t-test,  $df = 18.268$ ) B) Autodiploid frequency (red) and fitness advantage (orange) for focal populations (dashed lines). Solid lines indicate mean autodiploid frequency for 16 populations and mean fitness advantage for 13 populations. C) Haploid-founded populations demonstrate significantly higher rates of adaptation until autodiploids fix in the haploid-founded populations. From that point forward, haploid-founded (autodiploids) and diploid-founded populations adapt at the same rate. Lines indicate paired data points from the same population (teal: haploid-founded, yellow: diploid-founded). For each haploid-founded population, adaptation rate was calculated before and after autodiploid fixation, which occurred on average at generation 600. Adaptation rates for diploid-founded populations were calculated from Gen 0-600 and Gen 600-4000.

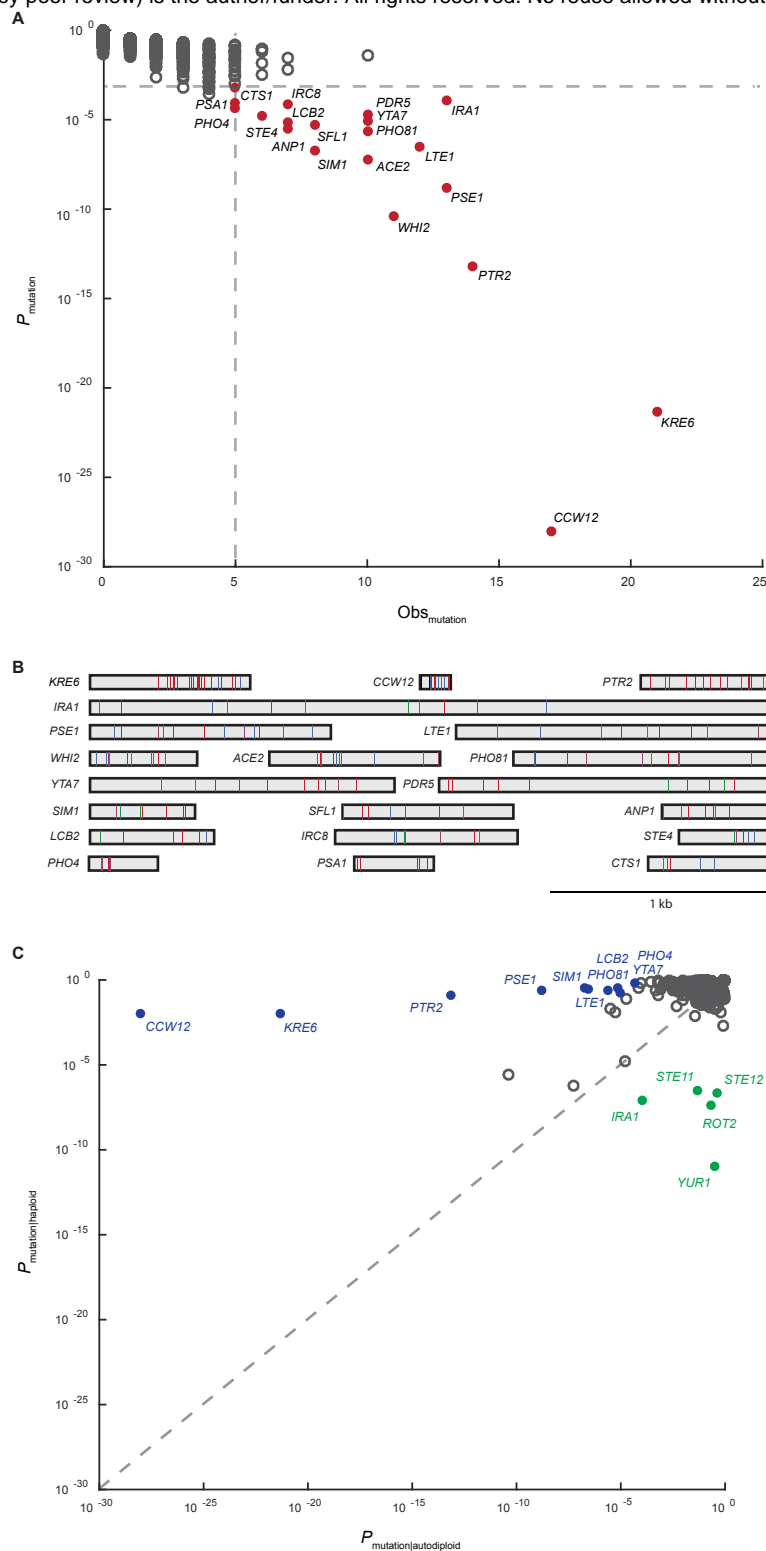

**Fig. 2 Common targets of selection and ploidy-enriched genes.** A) Plotted on the x-axis is the observed number of coding sequence (CDS) mutations in each of the 5800 genes in the S288c reference genome. On the y-axis is the probability that the observed number of CDS mutations in each gene occurred by chance. Common targets of selection (solid red circles) are genes with 5 or more CDS mutations and corresponding probability of less than 0.1%. B) Shown are all 188 mutations across the 20 common targets of selection. Genes are represented as rectangles and labelled by gene name. Mutations are colored by type: frameshift-purple, nonsense-blue, missense-red, synonymous-green, other-black. Both homozygous and heterozygous mutations are shown. C) Plotted is the probability that the observed number of CDS mutations in a gene occurred by chance in haploid populations versus autodioid populations. Genes were considered ploidy-enriched if the ratio of probabilities was greater than  $10^5$ . Haploid-enriched genes are indicated by solid green circles and autodioid-enriched genes as solid blue circles.

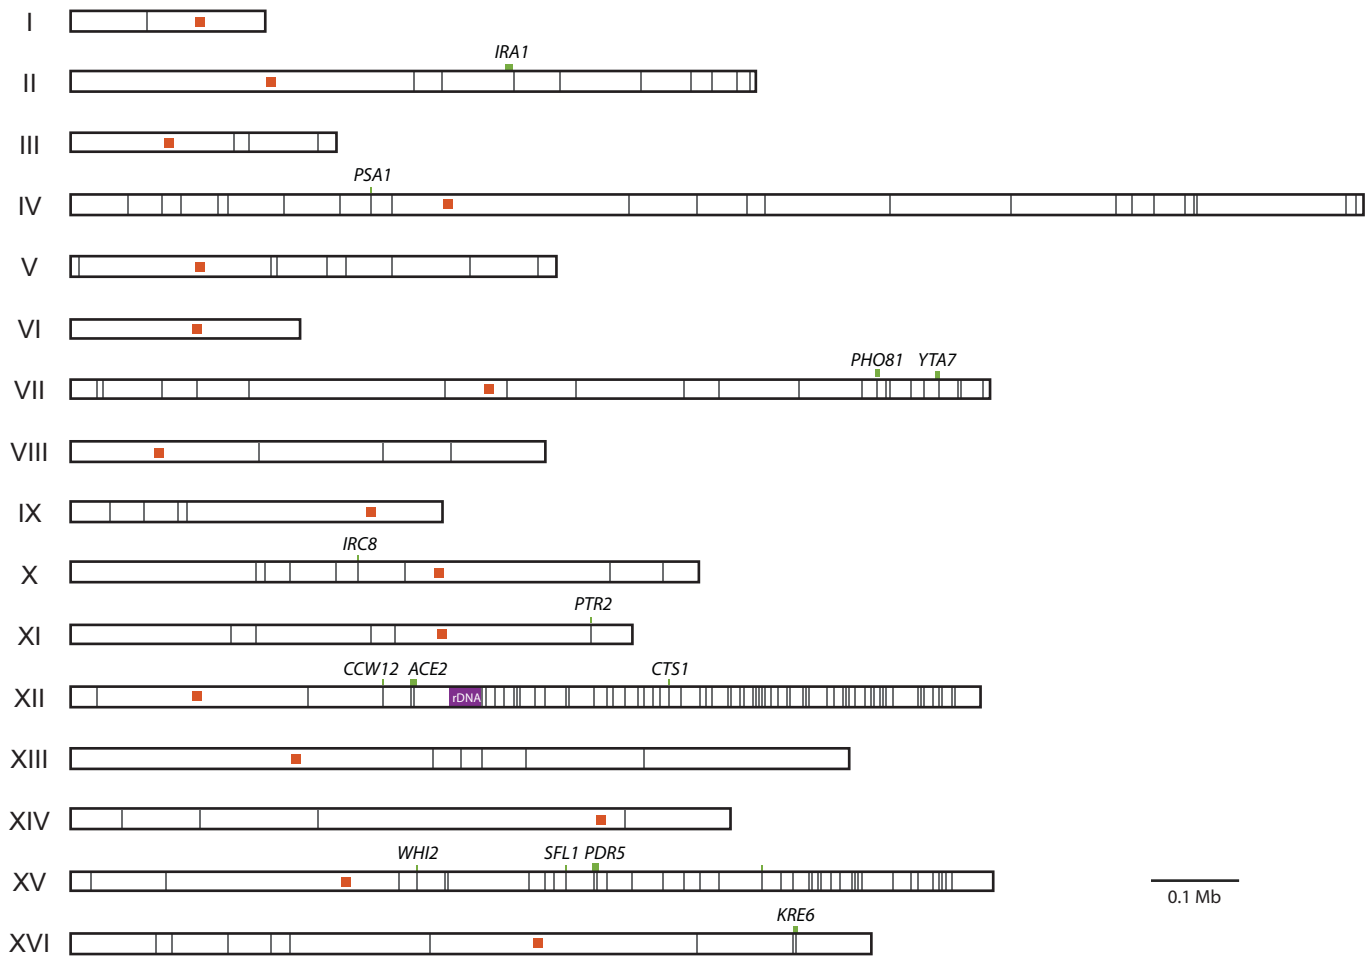

**Fig. 3 Enrichment of homozygous mutations on the right arms of Chr. XII and Chr. XV.** Shown in gray lines are the 256 homozygous mutations detected across the 92 evolved clones. Chromosomes are labeled by Roman numeral. Centromeres are shown as orange squares. Homozygous mutations in common targets of selection are marked by a green line (representing gene length) and labeled by gene name. The ribosomal DNA repeat region of Chr. XII, a known recombination hotspot, is shown in purple.



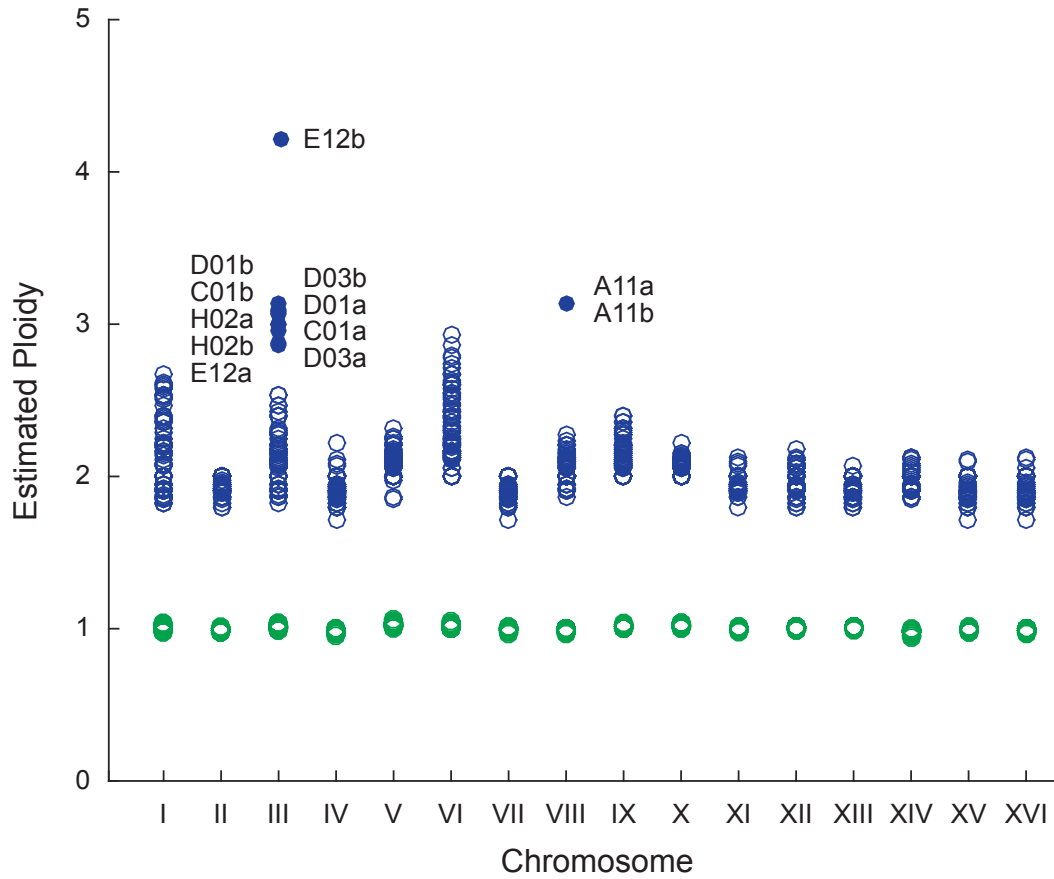

**Fig. 4 Detection of Aneuploidies.** For each sequenced sample, coverage across each chromosome was compared to genome-wide coverage. Based on DNA content staining, baseline ploidy was assumed to be 1N for haploids and 2N for autodiploids. Euploidy is indicated by empty circles: haploid - green, autodiploids - blue. Aneuploidies are shown as filled circles and labeled by clone.

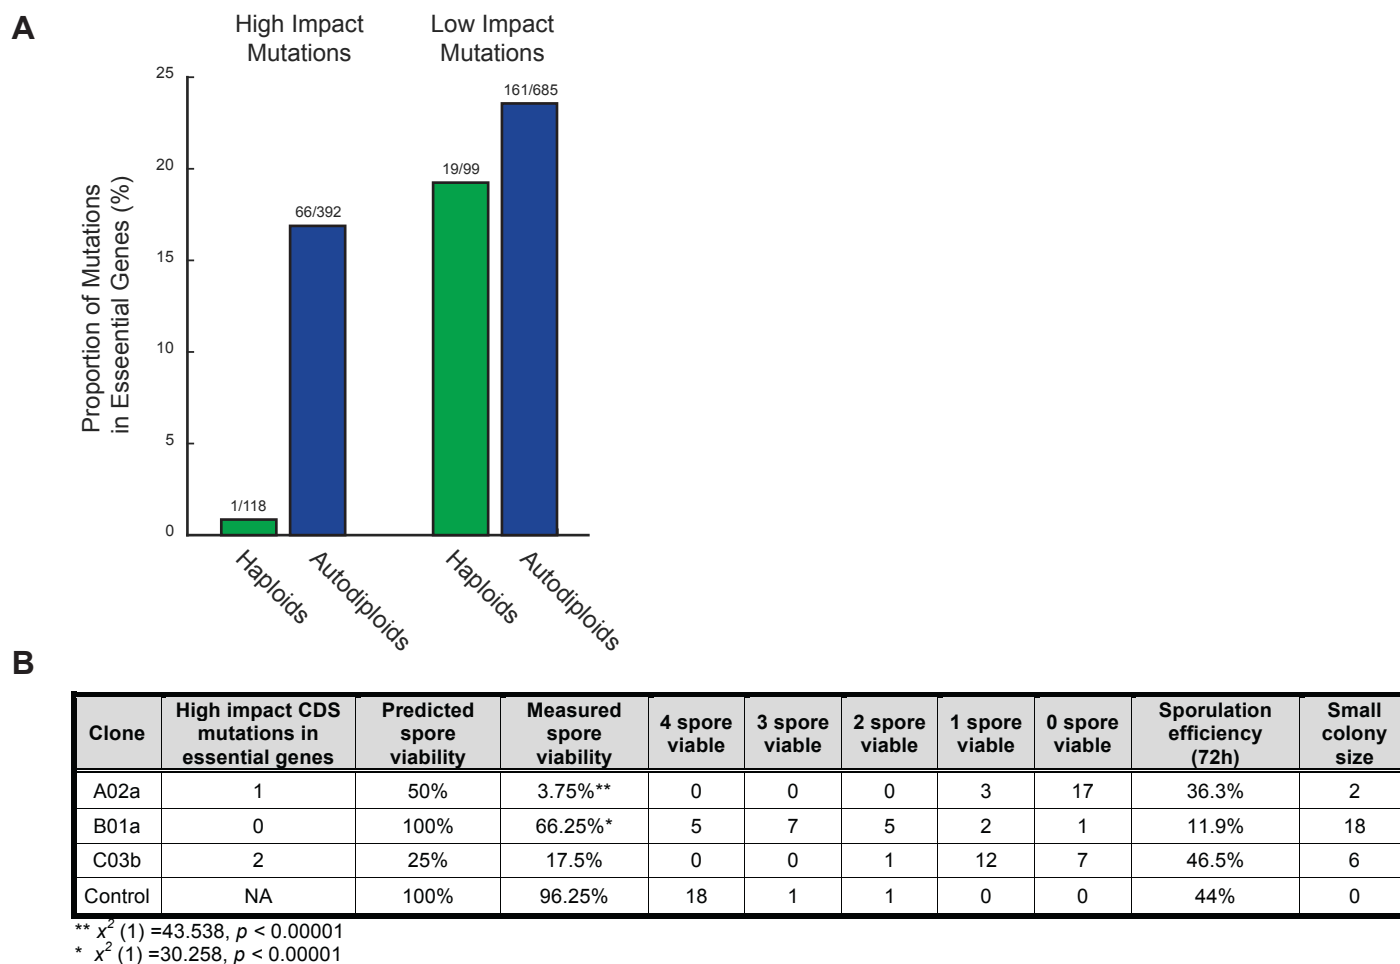

**Fig. 5 Recessive deleterious and lethal mutations.** A) Shown are the proportions of high impact mutations (frameshift, nonsense) and low impact mutations (synonymous, intronic) in essential genes in haploids (green) and autodiploids (blue). Above each bar is the ratio of mutations in essential genes to mutations in all genes. B) Clones from three evolved diploid populations were sporulated and dissected. Spore viability and small colony size reflect recessive lethal and recessive deleterious mutations, respectively.
